# Supplementary material for: Damage of polyesters by the atmospheric free radical oxidant NO3•: a product study involving model systems
Source: publisher site journal article supplement (doi:10.3762/bjoc.9.225), 2013-09-20

**Supporting Information**

**for**

**Damage of polyesters by the atmospheric free radical oxidant  $\text{NO}_3\cdot$ : a product study involving model systems**

Catrin Goeschen and Uta Wille\*

Address: ARC Centre of Excellence for Free Radical Chemistry and Biotechnology,  
School of Chemistry and Bio21 Institute, The University of Melbourne, 30 Flemington  
Road, Parkville, VIC 3010, Australia

Email: Uta Wille - [uville@unimelb.edu.au](mailto:uville@unimelb.edu.au)

\* Corresponding author

**HPLC chromatograms of raw reaction mixtures**

## Reaction of **3** with $\text{NO}_3^\bullet$ generated from CAN photolysis

HPLC chromatogram of the raw reaction mixture

(recorded at a wavelength  $\lambda = 230$  nm).

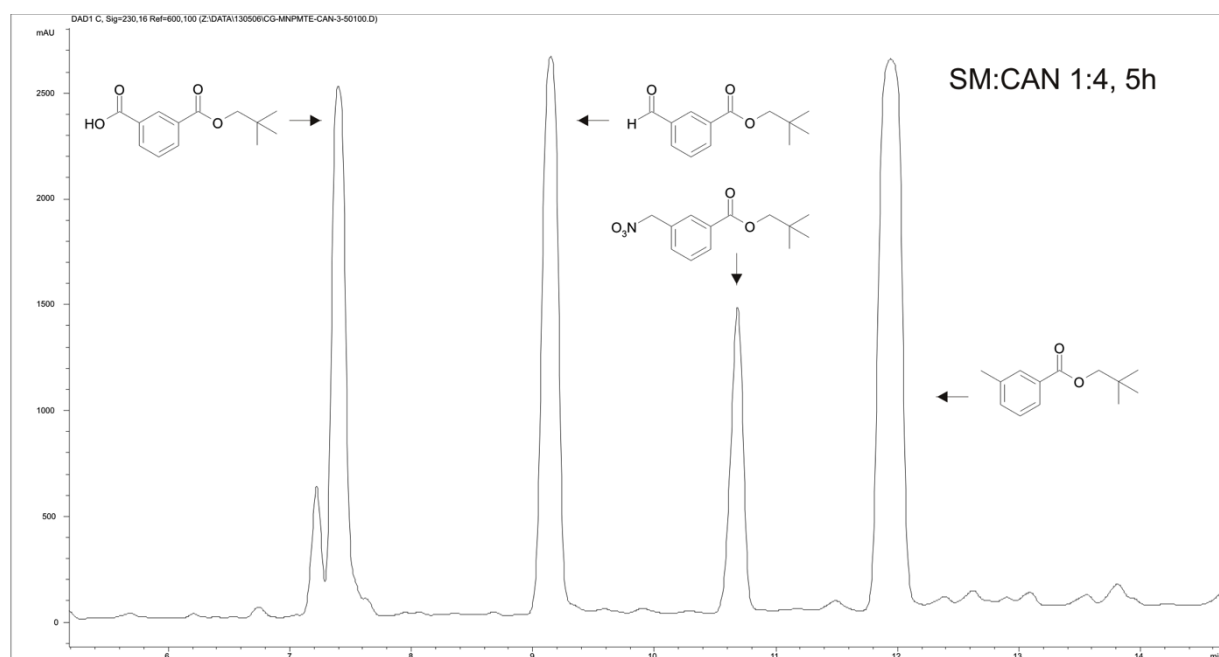

## Reaction of 3 with $\text{NO}_3^\bullet$ generated from $\text{NO}_2^\bullet$ and $\text{O}_3/\text{O}_2$

HPLC chromatogram of the raw reaction mixture

(recorded at a wavelength  $\lambda = 230 \text{ nm}$ ).

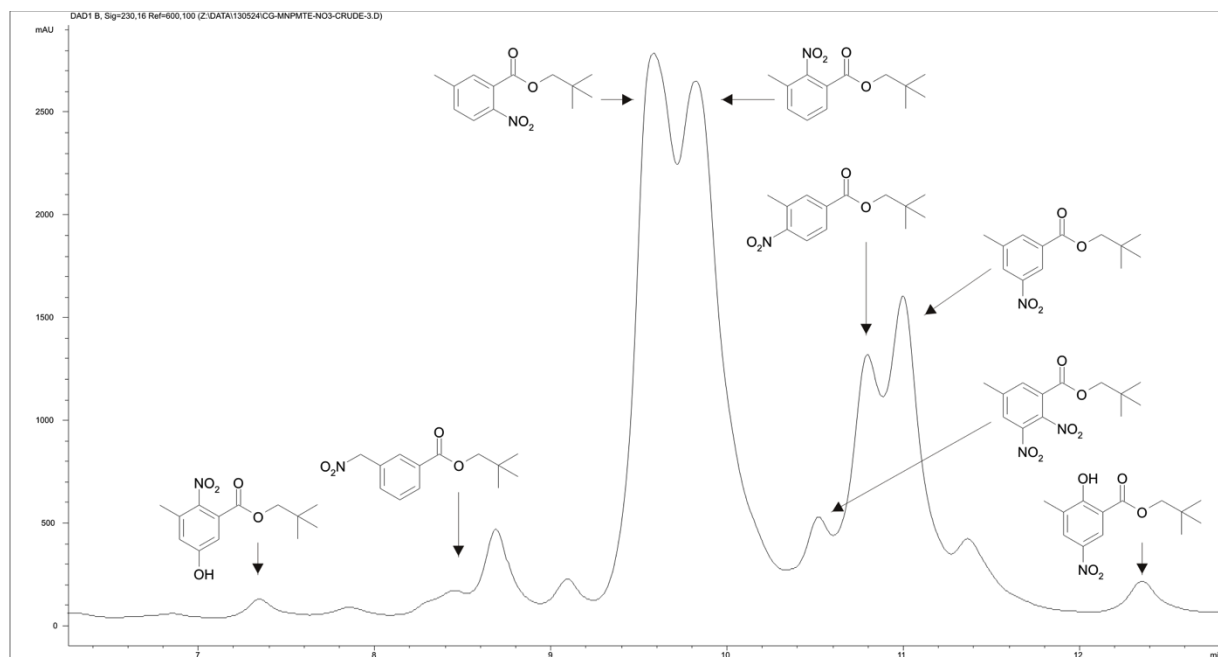

Supplement: Additional file 1 [file 1860-5397-9-225-S1.pdf]
